# Supplementary material for: Preschool Language Development of Children Born to Women with an Opioid Use Disorder
Source: MDPI journal article supplement (doi:10.3390/children8040268), 2021-03-31
Supplement: s1 [file s1]

## Supplementary

Table S1: Customized Child Rearing Environment Questionnaire – Adapted from the Dunedin Multidisciplinary Health and Development Study.

| No. | Item                                                               |
|-----|--------------------------------------------------------------------|
| 1   | Go to the park, playground, or library                             |
| 2   | Spend time talking to you about things                             |
| 3   | Be read a story                                                    |
| 4   | Go shopping or to the supermarket                                  |
| 5   | Share a family meal (i.e., mum, dad, kids)                         |
| 6   | Visit relatives or friends who have children                       |
| 7   | Learn a new skill from you (e.g., how to stack blocks, kick balls) |
| 8   | Help with something you are doing (e.g., baking, cleaning)         |
| 9   | Play a game with you (e.g., puzzles, peekaboos, ball)              |
| 10  | Get out of the house with parent or older person                   |
| 11  | Go to beach or pool                                                |
| 12  | Visit animal park, zoo or farm                                     |
| 13  | Make things (e.g., craftwork, coloring)                            |
| 14  | Get book from library                                              |
| 15  | Go on a family outing (e.g., movies, picnic, sport)                |
| 16  | Go to doctors or clinic                                            |
| 17  | Engage in messy play                                               |
| 18  | Stay overnight with friends or relatives                           |
| 19  | Friend to play                                                     |
| 20  | Go to a friend's house                                             |
| 21  | Be cared for by other parent                                       |
| 22  | Spend time playing with other parent                               |

All item responses in a Likert-type scale with responses from 0 to 4: 0: "never"; 1: "1-3 months"; 2: "monthly"; 3: "weekly"; 4: "daily".
